# Supplementary material for: Dynamic Increase in Extracellular ATP Accelerates Photoreceptor Cell Apoptosis via Ligation of P2RX7 in Subretinal Hemorrhage
Source: PubMed Central journal article supplement (PMC3540091; doi:10.1371/journal.pone.0053338), 2013-01-08
Supplement: pone.0053338.s001.pdf [file pone.0053338.s001.pdf]

## Supplemental Information S1

### Genotyping of the rd8 mutation by DNA sequencing in P2rx7<sup>-/-</sup> mice.

Recently, the rd8 mutation has been reported to be widely inherited across strains supplied by common commercial vendors and ES cell lines [45] [46]. To confirm that P2rx7<sup>-/-</sup> mice do not carry the rd8 mutation, we performed genotyping of the Crb1<sup>rd8</sup> allele carrying a single base pair deletion in exon 9 of the Crb1 gene. PCR amplification using flanking primers (5'-GCC CCT GTT TGC ATG GAG GAA ACT-3' and 5'-GCC CCA TTT GCA CAC TGA TGA C-3') and subsequent DNA sequencing demonstrated that the genotype of P2rx7<sup>-/-</sup> mice is the wild type allele ( $n = 6$ ). Ocular fundus examination also confirmed that P2rx7<sup>-/-</sup> mice have no phenotype of retinal degeneration, namely drusen-like lesions, which are found in mice carrying the rd8 mutation [46].
